# Supplementary material for: Likely pathogenic variants of SDC3, KCNA2, KCNK1, KCNK16 and HSF1 are in support of acquired irreversible PIEZO2 channelopathy in ALS onset
Source: Research Square preprint supplement (doi:10.21203/rs.3.rs-5662995/v1), 2025-01-03
Supplement: Supplementary file 1 [file 89d24f168fa940928ec36e26.xlsx]

## Sheet: Munka1
	Gene	Transcript number	Variant	MAF in non-Finnish European population in gnomAD	ACMG classification	Sample number
	KCNK1	NM_002245.4	c.2T>A; p.M1K	0	variant of unknown significance (VUS)	46r
	KCNK16	NM_001135106.2	c.502C>T; p.Q168TER	0	variant of unknown significance (VUS)	64r
	KCNK16	NM_001135106.2	c.355G>C; p.E119Q	0	benign leaning VUS	42r
	KCNK10	NM_138317.3	c.599T>C; p.F200S	0	benign leaning VUS	48r
	KCNK17	NM_031460.4	c.175A>C; p.K59Q	0.0012%	benign leaning VUS	72r
	KCNK5	NM_003740.4	c.481A>C; p.T161P	0	benign leaning VUS	78r
